# Supplementary material for: Human Leg Model Predicts Ankle Muscle-Tendon Morphology, State, Roles and Energetics in Walking
Source: PLOS journal article supplement (doi:10.1371/journal.pcbi.1001107), 2011-03-17
Supplement: S2 (10.1371/journal.pcbi.1001107.s002) [file journal.pcbi.1001107.s002]

301 Moved Permanently

# Moved Permanently

The document has moved here.

---

Apache Server at www.ploscompbiol.org Port 80
